# Supplementary material for: Visible light triggered aggregation-induced emission switching with a donor–acceptor Stenhouse adduct
Source: Royal Society of Chemistry journal article supplement (doi:10.1039/c8tc02621a), 2018-01-01
Supplement: c8tc02621a1.pdf [file c8tc02621a1.pdf]

## Supporting Information

Bing Wu, Tianhao Xue, Wei Wang, Shang Li, Jiajia Shen and Yaning He\*

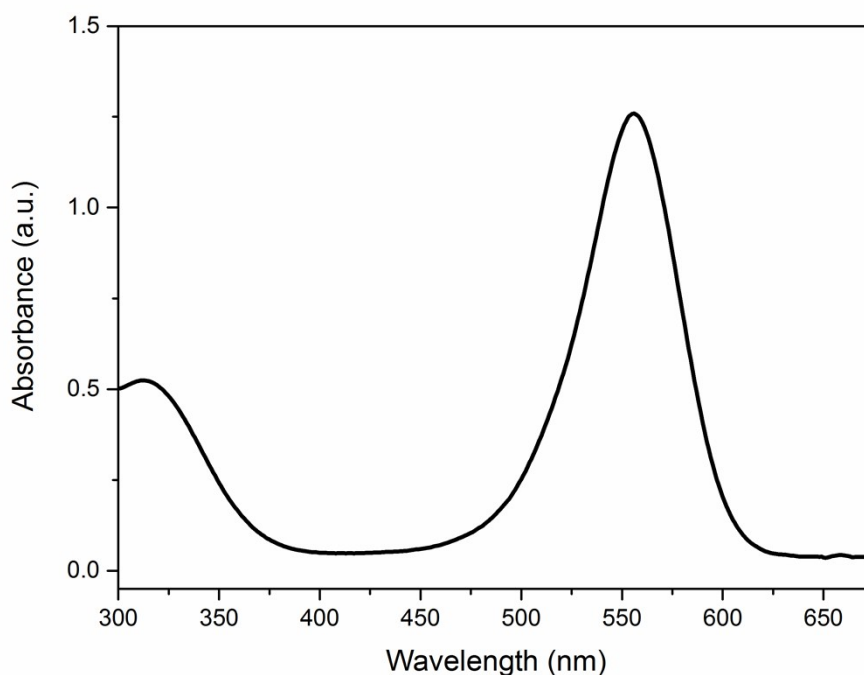

Figure S1 UV-Vis spectrum of TPE-DASA before visible light (532 nm) irradiation in THF. [TPE-DASA]= $4.456 \times 10^{-5}$  M.

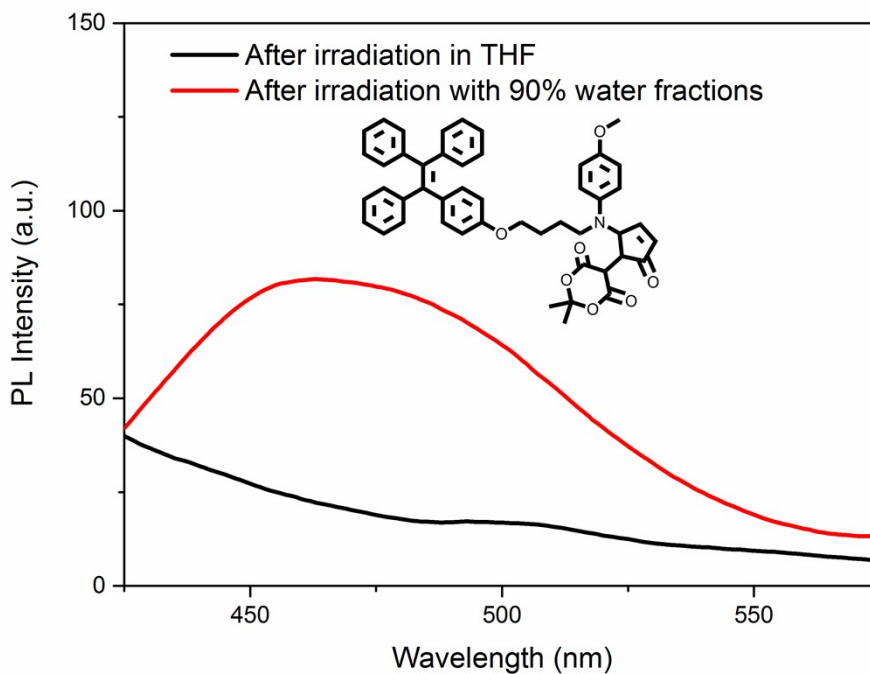

Figure S2 Photoluminescence spectra of TPE-DASA after visible light (532 nm) irradiation with 90% water fractions and pure THF excited at 322 nm (red line: 90% water fractions; black line: pure THF). [TPE-DASA]= $4.456 \times 10^{-5}$  M.

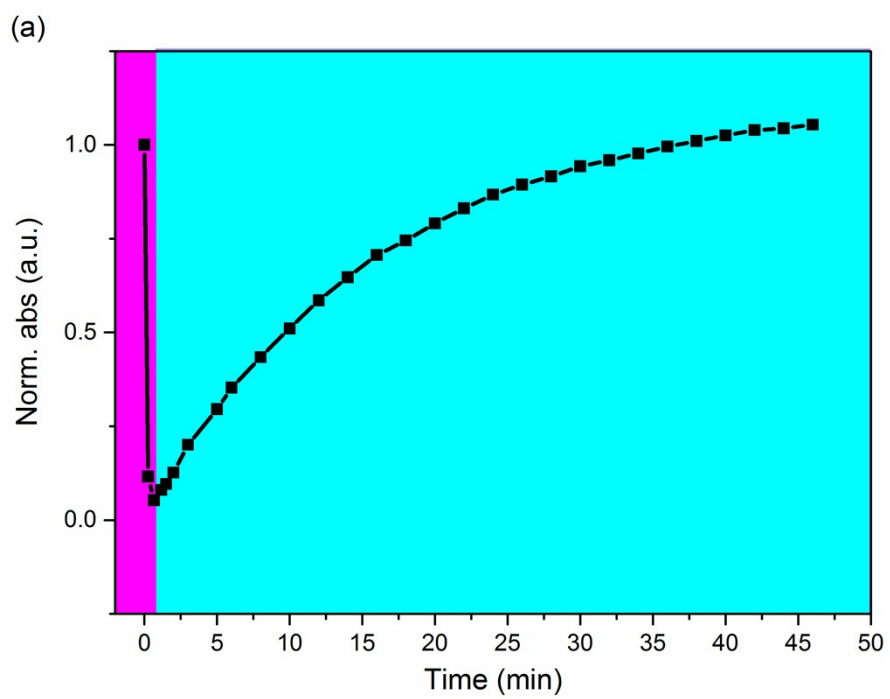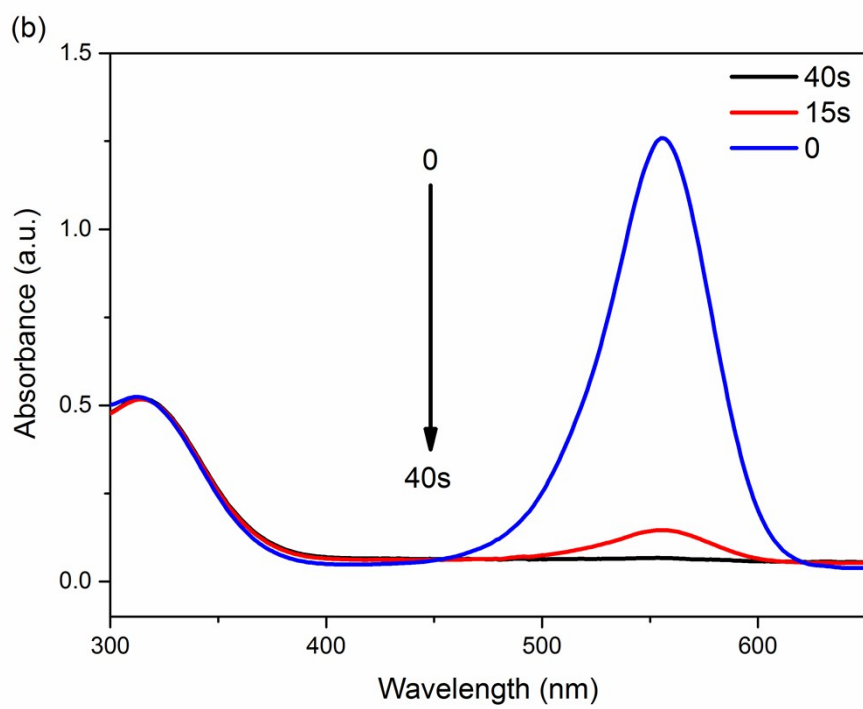

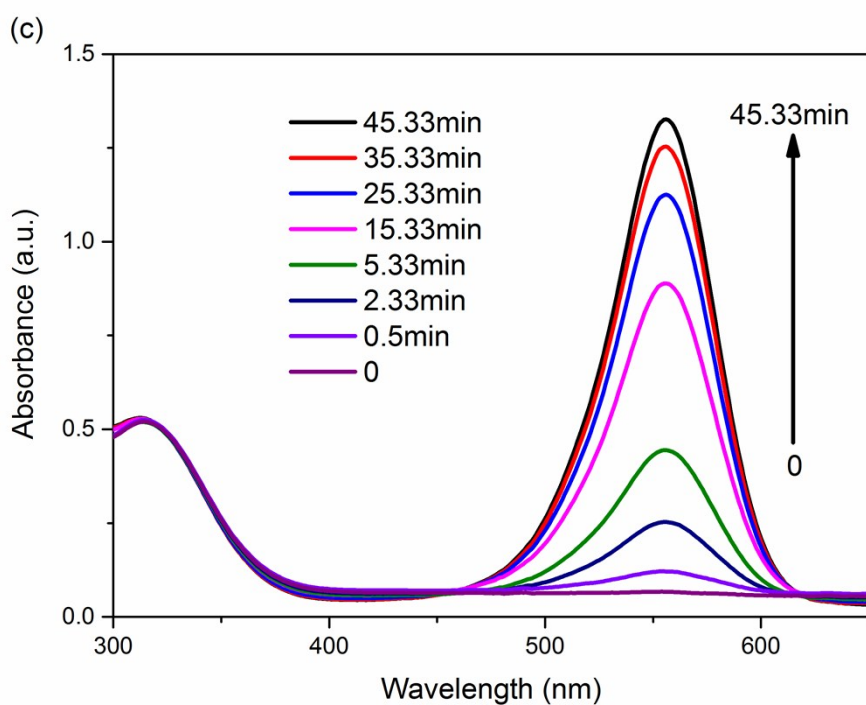

Figure S3 (a) The curve of relative absorption peak intensity of TPE-DASA in THF at 556 nm vs. irradiation and darkness time (purple region: irradiation; blue region: darkness). UV-Vis spectra of TPE-DASA were measured in THF at different visible light (532 nm) irradiation time (b) and darkness time (c).  $[TPE-DASA] = 4.456 \times 10^{-5} M$ .

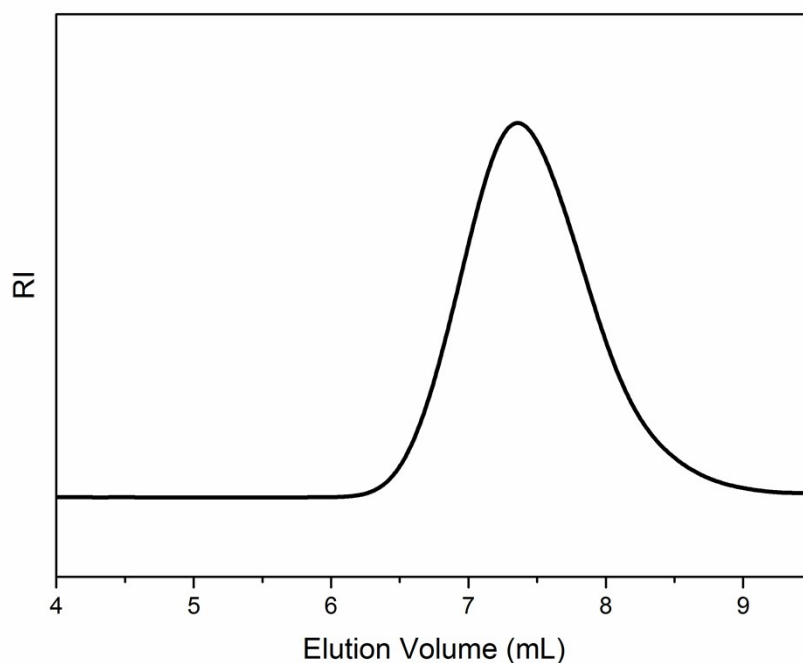

Figure S4 The GPC trace of polymethyl methacrylate (PMMA) ( $M_n = 15,000 \text{ g}\cdot\text{mol}^{-1}$ ,  $M_w = 28,000 \text{ g}\cdot\text{mol}^{-1}$ , PDI = 1.87)

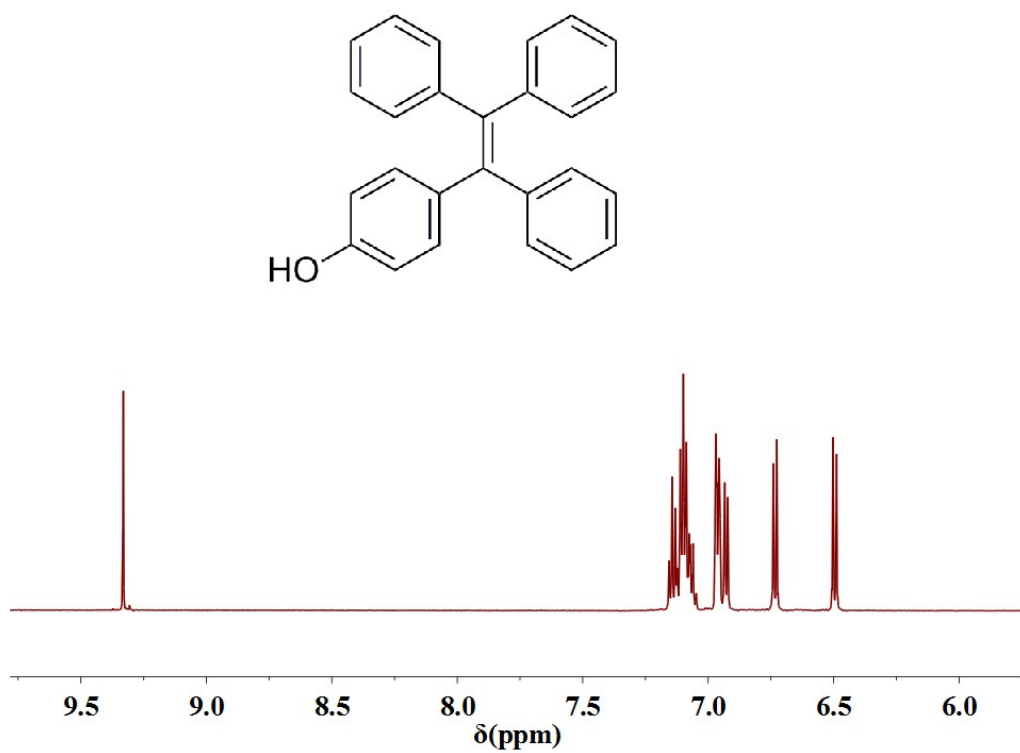

Figure S5 <sup>1</sup>H NMR spectrum of TPE-OH in DMSO-d<sub>6</sub>

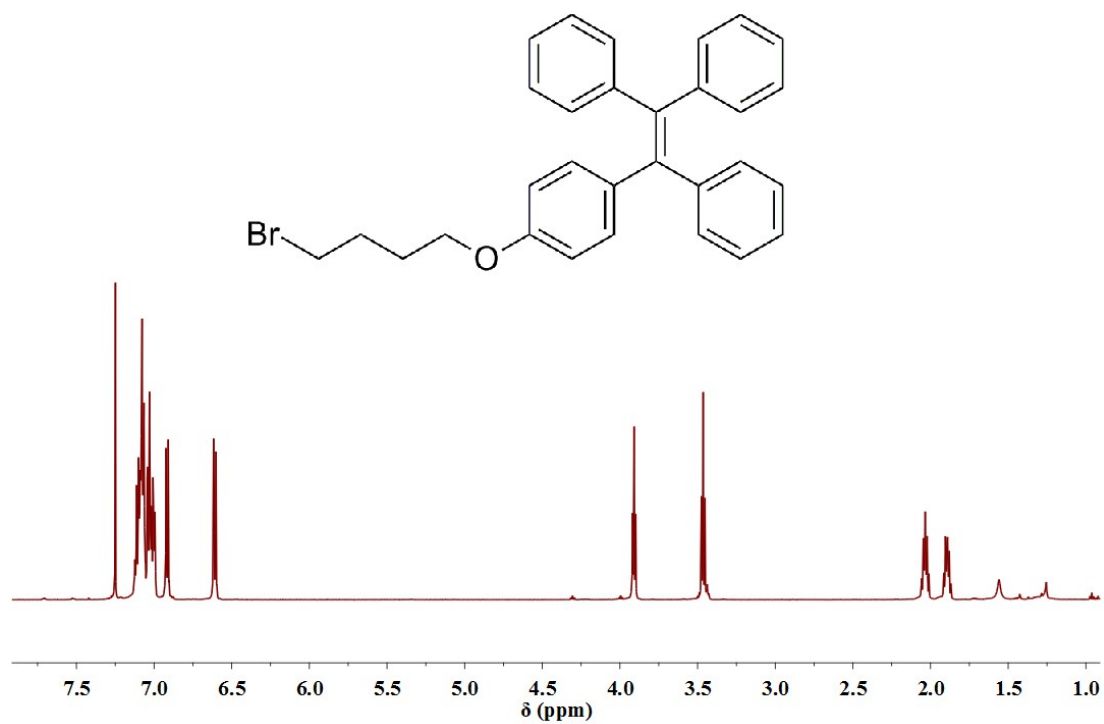

Figure S6 <sup>1</sup>H NMR spectrum of TPE-Br in CDCl<sub>3</sub>

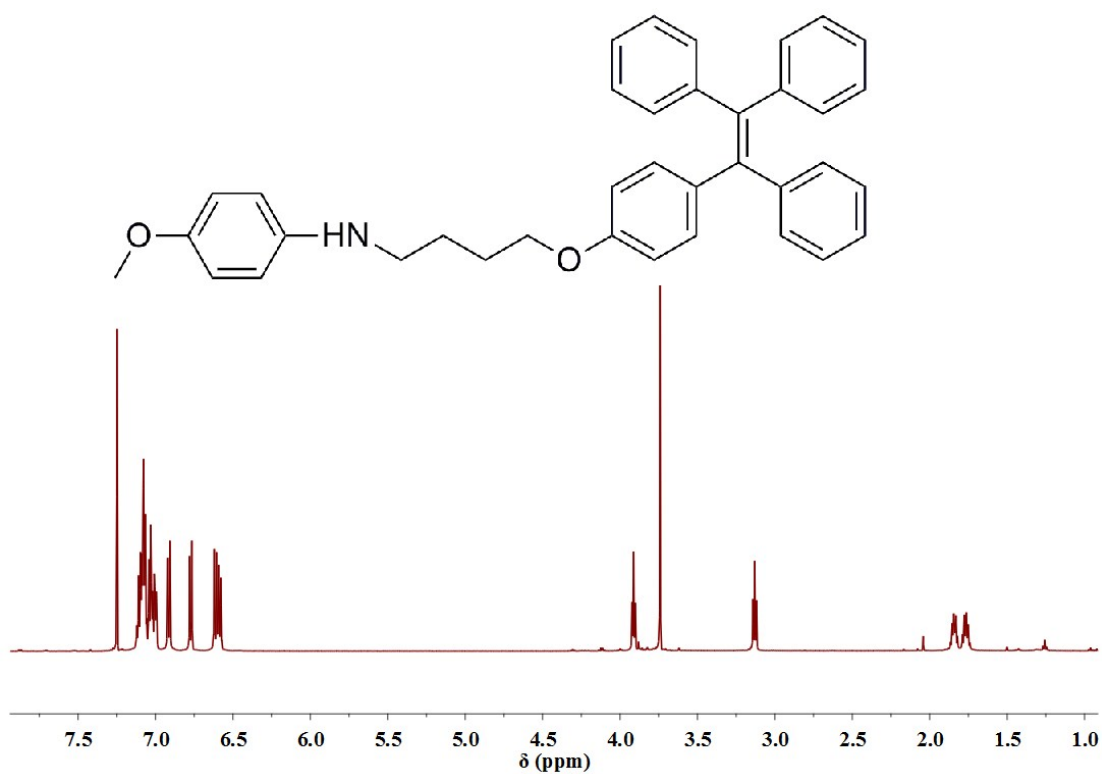

Figure S7 <sup>1</sup>H NMR spectrum of TPE-NH in CDCl<sub>3</sub>

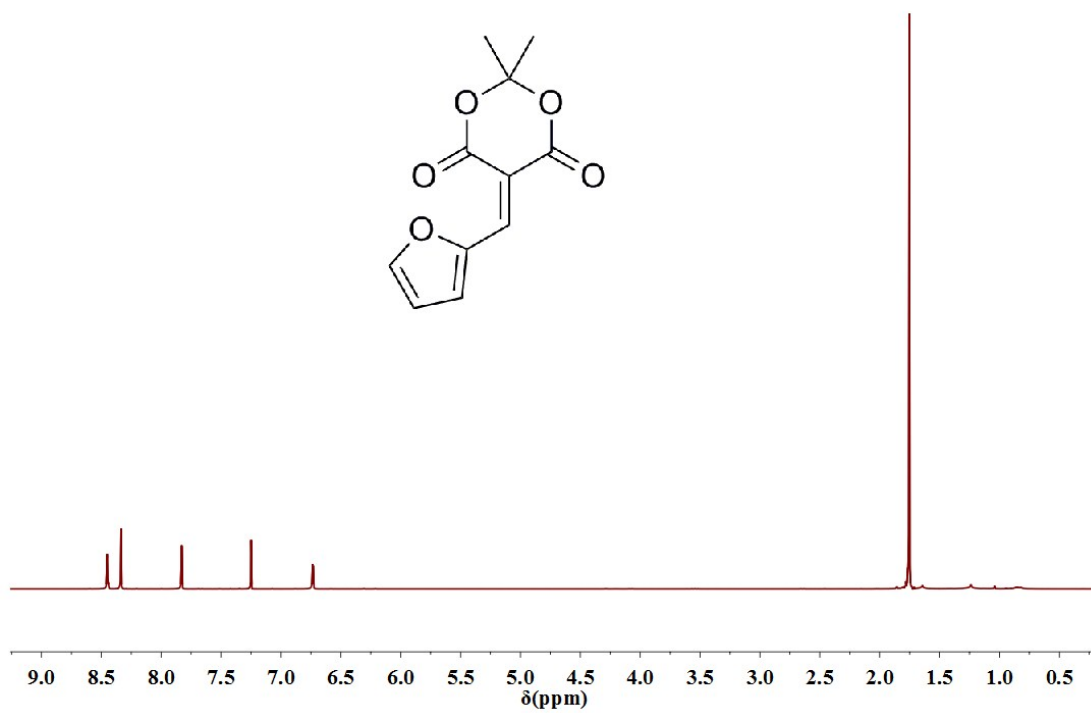

Figure S8 <sup>1</sup>H NMR spectrum of 5-(furan-2-ylmethylene)-2,2-dimethyl-1,3-dioxane-4,6-dione in CDCl<sub>3</sub>

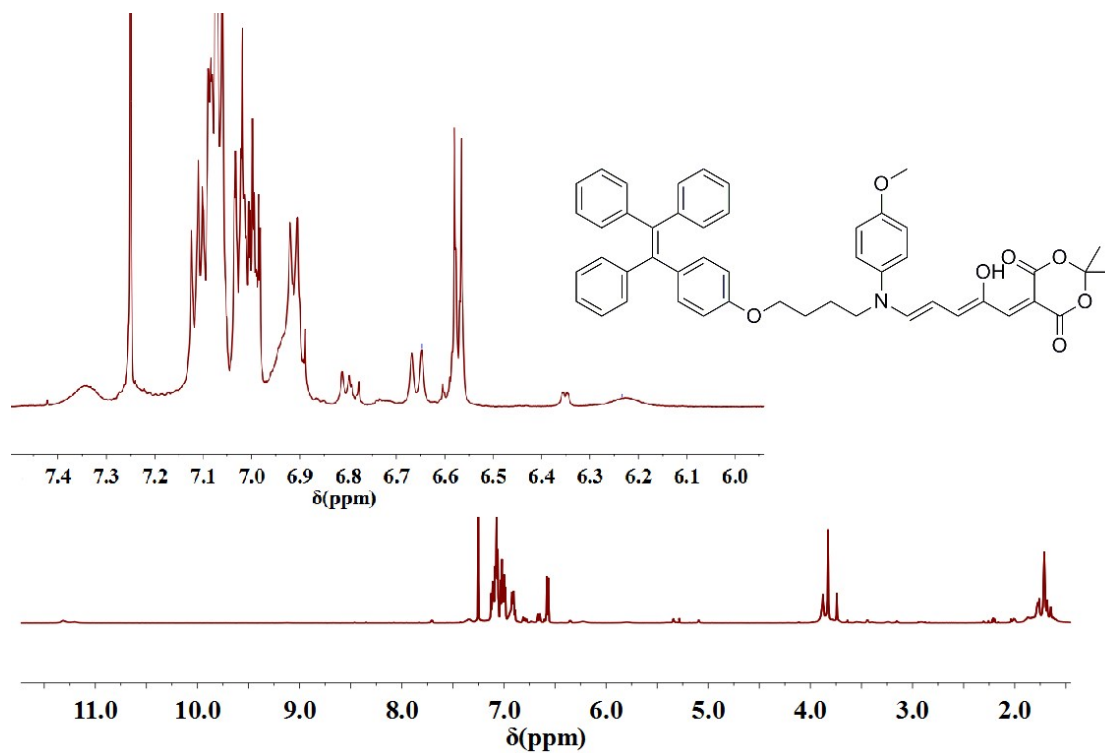

Figure S9 <sup>1</sup>H NMR spectrum of TPE-DASA in CDCl<sub>3</sub>

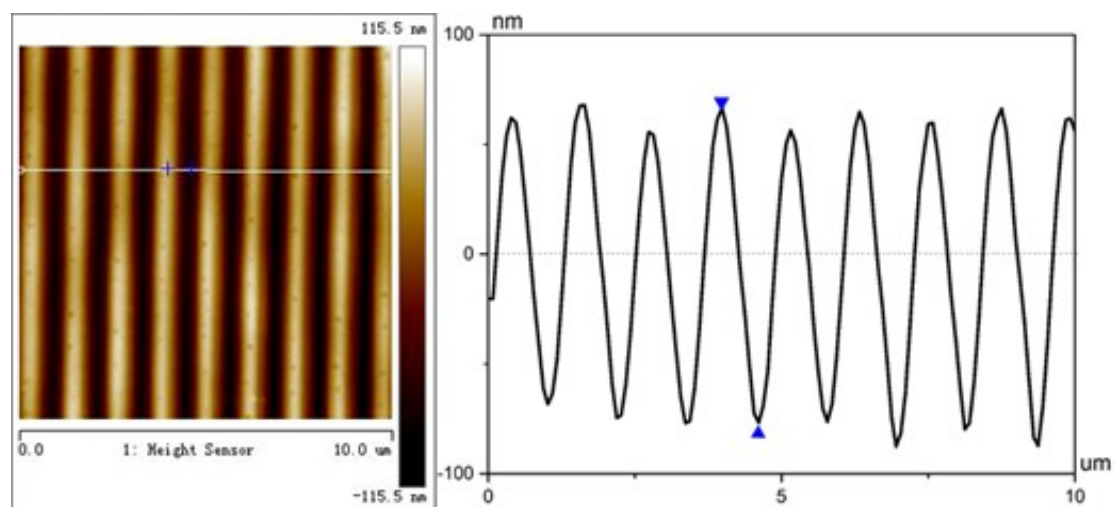

Figure S10 2D-view topographical AFM image of surface relief gratings of TPE-DASA (open form).

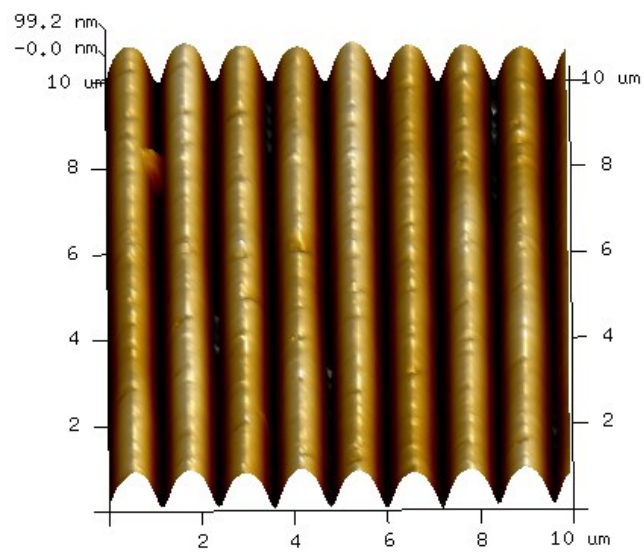

Figure S11 3D-view topographical AFM image of surface relief gratings of TPE-DASA after visible light (532 nm) irradiation for 15 min.

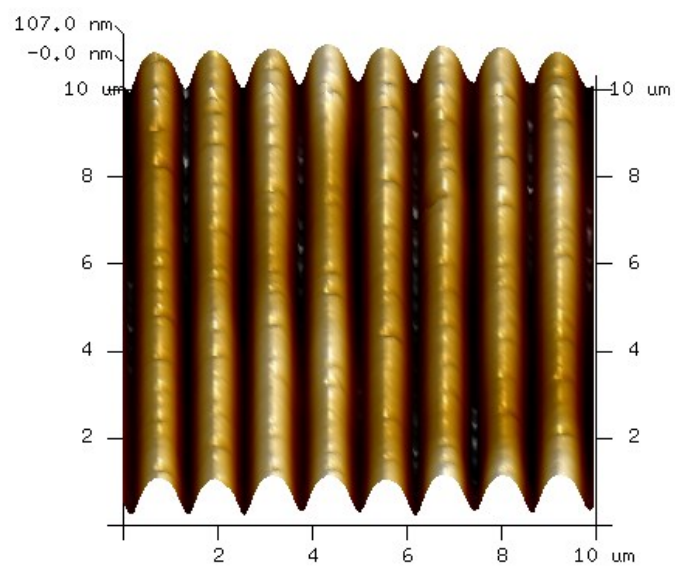

Figure S12 3D-view topographical AFM image of surface relief gratings of TPE-DASA after heating at 55 °C for 10 min.

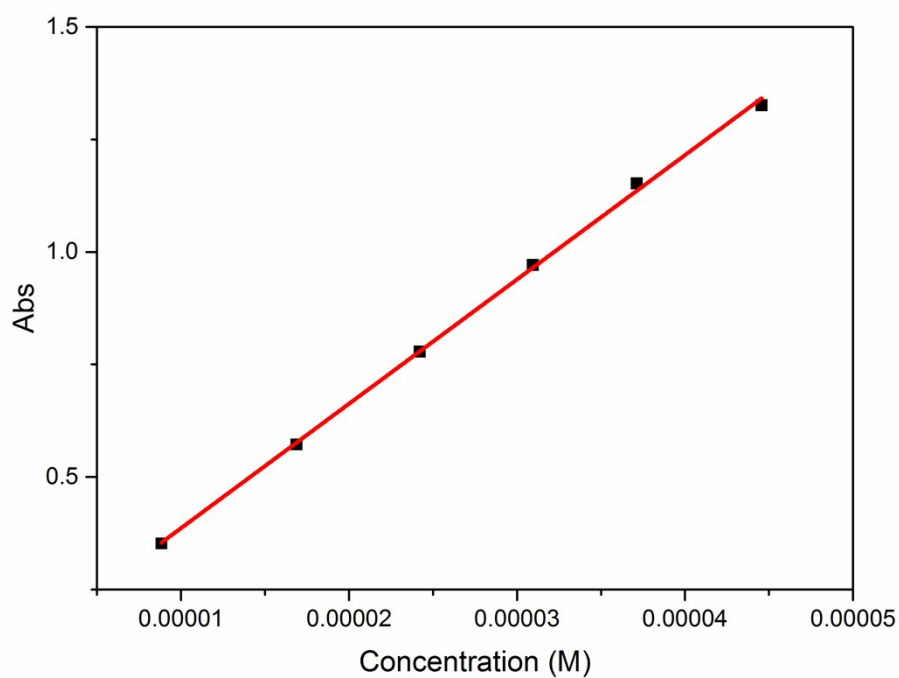

Figure S13 Linear plot of Abs at 556 nm vs concentration (M) of TPE-DASA in THF (Molar extinction coefficient in THF is about  $27600 \text{ M}^{-1}\text{cm}^{-1}$ ).

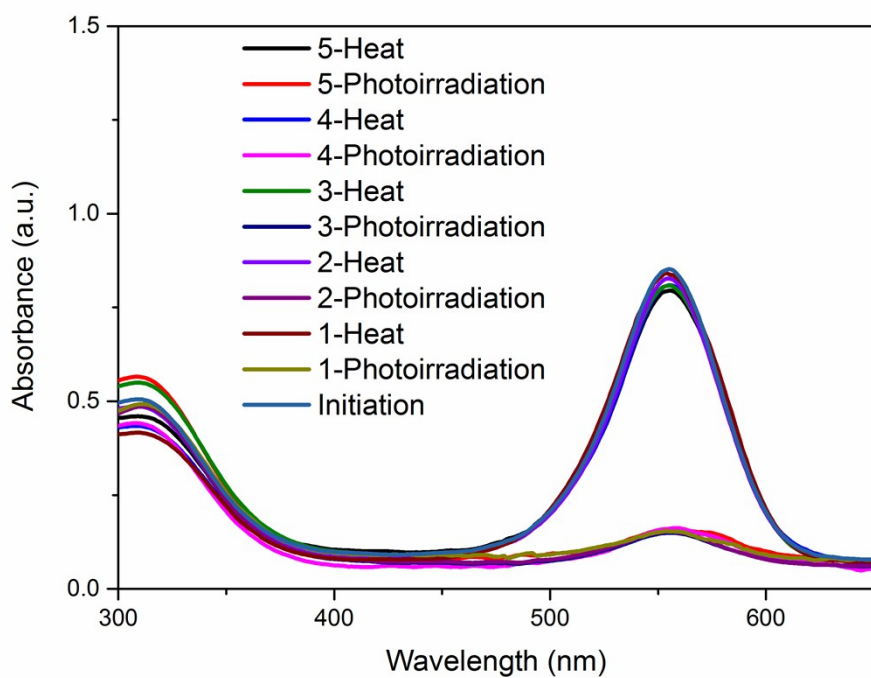

Figure S14 UV-Vis spectra of TPE-DASA film upon alternating visible light irradiation and heating.
